# Supplementary material for: Na2CdGe2Q6(Q = S, Se): two metal-mixed chalcogenides with phase-matching abilities and large second-harmonic generation responses
Source: Royal Society of Chemistry journal article supplement (doi:10.1039/c7dt00087a), 2017-01-01
Supplement: c7dt00087a1.pdf [file c7dt00087a1.pdf]

## ESI

### **Na<sub>2</sub>CdGe<sub>2</sub>Q<sub>6</sub> (Q = S, Se): two metal-mixed chalcogenides with phase-matching abilities and large second-harmonic generation responses**

Guang-mao Li,<sup>a, b</sup> Qiong Liu,<sup>a, b</sup> Kui Wu,<sup>\*a</sup> Zhi-hua Yang,<sup>a</sup> Shi-lie Pan<sup>\*a</sup>

<sup>a</sup> Key Laboratory of Functional Materials and Devices for Special Environments,  
Xinjiang Technical Institute of Physics & Chemistry, Chinese Academy of Sciences;  
Xinjiang Key Laboratory of Electronic Information Materials and Devices; 40-1  
South Beijing Road, Urumqi 830011, China

<sup>b</sup> University of Chinese Academy of Sciences, Beijing 100049, China

---

## ESI

### 1. Tables and Figures

**Table S1.** Atomic bond-valence and isotropic displacement parameters for title compounds.

**Table S2.** A series of IR materials with structural transformations.

**Table S3.** Dipole-moment calculation for title compounds.

**Figure S1.** Raman spectra for title compounds.

**Figure S2.** SHG density calculation for  $\text{Na}_2\text{CdGe}_2\text{S}_6$ .

### 2. References

**Table S1.** Atomic bond-valence and isotropic displacement parameters for title compounds.

| <b>Na<sub>2</sub>CdGe<sub>2</sub>S<sub>6</sub></b> |        |            |           |           |          |       |
|----------------------------------------------------|--------|------------|-----------|-----------|----------|-------|
| toms                                               | S.O.F. | x          | y         | z         | U(eq)    | BVS   |
| Na(1)                                              | 1      | 0.3778(5)  | 0.3000(3) | 0.7196(3) | 0.052(1) | 0.970 |
| Na(2)                                              | 1      | -0.0219(5) | 0.5115(2) | 0.3514(3) | 0.051(1) | 0.964 |
| Cd(1)                                              | 1      | 0.8114(1)  | 0.2513(1) | 0.5591(1) | 0.023(1) | 2.185 |
| Ge(1)                                              | 1      | 0.4371(1)  | 0.3628(1) | 0.3366(1) | 0.017(1) | 4.076 |
| Ge(2)                                              | 1      | 0.6212(1)  | 0.5247(1) | 0.5852(1) | 0.016(1) | 4.080 |
| S(1)                                               | 1      | 0.8823(2)  | 0.4453(1) | 0.5758(2) | 0.024(1) | 1.967 |
| S(2)                                               | 1      | 0.3655(2)  | 0.4341(1) | 0.5027(1) | 0.022(1) | 1.993 |
| S(3)                                               | 1      | 0.11285(2) | 0.1869(1) | 0.5295(2) | 0.023(1) | 1.893 |
| S(4)                                               | 1      | 0.5909(3)  | 0.4994(1) | 0.2742(1) | 0.027(1) | 2.247 |
| S(5)                                               | 1      | 0.6068(2)  | 0.2206(1) | 0.3640(1) | 0.023(1) | 2.156 |
| S(6)                                               | 1      | 0.1764(2)  | 0.3436(1) | 0.2200(1) | 0.025(1) | 2.018 |

  

| <b>Na<sub>2</sub>CdGe<sub>2</sub>Se<sub>6</sub></b> |        |            |           |           |          |       |
|-----------------------------------------------------|--------|------------|-----------|-----------|----------|-------|
| atoms                                               | S.O.F. | x          | y         | z         | U(eq)    | BVS   |
| Na(1)                                               | 1      | 0.6702(13) | 0.2986(6) | 0.3087(8) | 0.057(2) | 0.965 |
| Na(2)                                               | 1      | 0.5656(11) | 0.066(5)  | 0.6814(7) | 0.048(2) | 0.988 |
| Cd(1)                                               | 1      | 0.2355(2)  | 0.2501(1) | 0.4722(1) | 0.028(1) | 2.268 |
| Ge(1)                                               | 1      | 0.4292(2)  | 0.5231(1) | 0.4454(1) | 0.019(1) | 4.094 |
| Ge(2)                                               | 1      | 0.6129(2)  | 0.3611(1) | 0.6935(2) | 0.019(1) | 4.093 |
| Se(1)                                               | 1      | 0.4557(3)  | 0.4977(1) | 0.2527(2) | 0.027(1) | 2.225 |
| Se(2)                                               | 1      | 0.3763(2)  | 0.1550(1) | 0.3159(2) | 0.030(1) | 2.042 |
| Se(3)                                               | 1      | 0.6923(2)  | 0.4323(1) | 0.5264(1) | 0.023(1) | 2.020 |
| Se(4)                                               | 1      | 0.1609(2)  | 0.4435(1) | 0.4549(2) | 0.025(1) | 1.975 |
| Se(5)                                               | 1      | 0.4412(2)  | 0.2158(1) | 0.6646(1) | 0.029(1) | 2.208 |
| Se(6)                                               | 1      | -0.0844(3) | 0.1882(1) | 0.5014(2) | 0.027(1) | 1.917 |

**Table S2.** A series of IR materials with structural transformation.

|                                                                |                                                                 |                                                                  |                                                                              |                                               |                                                                |
|----------------------------------------------------------------|-----------------------------------------------------------------|------------------------------------------------------------------|------------------------------------------------------------------------------|-----------------------------------------------|----------------------------------------------------------------|
| AgGaS <sub>2</sub> <sup>1a</sup>                               | -42m                                                            | tetragonal                                                       | Li <sub>2</sub> In <sub>2</sub> SiSe <sub>6</sub> <sup>20</sup>              | Cc                                            | monoclinic                                                     |
| AgGaSe <sub>2</sub> <sup>1b</sup>                              |                                                                 |                                                                  | Li <sub>2</sub> In <sub>2</sub> GeS <sub>6</sub> <sup>20</sup>               |                                               |                                                                |
| AgGaTe <sub>2</sub> <sup>1c</sup>                              | Li <sub>2</sub> In <sub>2</sub> GeSe <sub>6</sub> <sup>20</sup> |                                                                  |                                                                              |                                               |                                                                |
| LiGaTe <sub>2</sub> <sup>2</sup>                               | I-42d                                                           |                                                                  | Na <sub>2</sub> Hg <sub>3</sub> Ge <sub>2</sub> S <sub>8</sub> <sup>21</sup> | P4̄c2                                         | tetragonal                                                     |
| LiInTe <sub>2</sub> <sup>2</sup>                               |                                                                 |                                                                  | Na <sub>2</sub> Hg <sub>3</sub> Si <sub>2</sub> S <sub>8</sub> <sup>21</sup> |                                               |                                                                |
| LiAlTe <sub>2</sub> <sup>2</sup>                               |                                                                 |                                                                  | Na <sub>2</sub> Hg <sub>3</sub> Sn <sub>2</sub> S <sub>8</sub> <sup>21</sup> |                                               |                                                                |
| LiGaS <sub>2</sub> <sup>2</sup>                                | Pna21                                                           | orthorhombic                                                     | K <sub>2</sub> Hg <sub>3</sub> Ge <sub>2</sub> S <sub>8</sub> <sup>22</sup>  | Aba2/C2                                       | orthorhombic/monoclinic                                        |
| LiInS <sub>2</sub> <sup>2</sup>                                |                                                                 |                                                                  | Rb <sub>2</sub> Hg <sub>3</sub> Ge <sub>2</sub> S <sub>8</sub> <sup>23</sup> | P21/c                                         | monoclinic                                                     |
| LiGaSe <sub>2</sub> <sup>2</sup>                               |                                                                 |                                                                  | Rb <sub>2</sub> Hg <sub>3</sub> Sn <sub>2</sub> S <sub>8</sub> <sup>23</sup> |                                               |                                                                |
| LiInSe <sub>2</sub> <sup>2</sup>                               |                                                                 |                                                                  | Cs <sub>2</sub> Hg <sub>3</sub> Ge <sub>2</sub> S <sub>8</sub> <sup>23</sup> | P-1                                           | triclinic                                                      |
| LiAlS <sub>2</sub> <sup>2</sup>                                |                                                                 |                                                                  | Cs <sub>2</sub> Hg <sub>3</sub> Sn <sub>2</sub> S <sub>8</sub> <sup>23</sup> |                                               |                                                                |
| LiAlSe <sub>2</sub> <sup>2</sup>                               |                                                                 |                                                                  | Pca21                                                                        | orthorhombic                                  | KCd <sub>4</sub> Ga <sub>5</sub> S <sub>12</sub> <sup>24</sup> |
| NaAsSe <sub>2</sub> <sup>3</sup>                               | RbCd <sub>4</sub> Ga <sub>5</sub> S <sub>12</sub> <sup>24</sup> |                                                                  |                                                                              |                                               |                                                                |
| Na <sub>2</sub> Ge <sub>2</sub> S <sub>5</sub> <sup>4</sup>    | Cmcm                                                            | CsCd <sub>4</sub> Ga <sub>5</sub> S <sub>12</sub> <sup>24</sup>  |                                                                              |                                               |                                                                |
| Na <sub>2</sub> Ge <sub>2</sub> Se <sub>5</sub> <sup>5</sup>   | Pna21                                                           | CsMn <sub>4</sub> In <sub>5</sub> Te <sub>12</sub> <sup>25</sup> |                                                                              |                                               |                                                                |
| KPSe <sub>6</sub> <sup>6</sup>                                 | Pca21                                                           | orthorhombic                                                     | CsZn <sub>4</sub> In <sub>5</sub> Te <sub>12</sub> <sup>25</sup>             |                                               |                                                                |
| RbPSe <sub>6</sub> <sup>6</sup>                                |                                                                 |                                                                  | CsCd <sub>4</sub> In <sub>5</sub> Te <sub>12</sub> <sup>25</sup>             |                                               |                                                                |
| CsPSe <sub>6</sub> <sup>6</sup>                                | P2/n                                                            | monoclinic                                                       | Cs <sub>2</sub> ZnGe <sub>3</sub> S <sub>8</sub> <sup>26</sup>               | P21/c                                         | monoclinic                                                     |
| BaGa <sub>4</sub> S <sub>7</sub> <sup>7</sup>                  | Pmn21                                                           | orthorhombic                                                     | Cs <sub>2</sub> ZnGe <sub>3</sub> Se <sub>8</sub> <sup>26</sup>              | P2 <sub>1</sub> 2 <sub>1</sub> 2 <sub>1</sub> | orthorhombic                                                   |
| BaGa <sub>4</sub> Se <sub>7</sub> <sup>8</sup>                 | Pc                                                              | monoclinic                                                       | Cs <sub>2</sub> ZnGe <sub>3</sub> Te <sub>8</sub> <sup>26</sup>              |                                               |                                                                |
| BaAl <sub>4</sub> Se <sub>7</sub> <sup>9</sup>                 |                                                                 |                                                                  | Cs <sub>2</sub> CdGe <sub>3</sub> S <sub>8</sub> <sup>26</sup>               |                                               |                                                                |
| SnGa <sub>4</sub> S <sub>7</sub> <sup>10</sup>                 |                                                                 |                                                                  | Cs <sub>2</sub> CdGe <sub>3</sub> Se <sub>8</sub> <sup>26</sup>              |                                               |                                                                |
| SnGa <sub>4</sub> Se <sub>7</sub> <sup>10</sup>                |                                                                 |                                                                  | Cs <sub>2</sub> MgGe <sub>3</sub> Se <sub>8</sub> <sup>26</sup>              |                                               |                                                                |
| PbGa <sub>4</sub> S <sub>7</sub> <sup>20</sup>                 |                                                                 |                                                                  | Ba <sub>3</sub> GaS <sub>4</sub> Cl <sup>27</sup>                            |                                               |                                                                |
| Cd <sub>4</sub> SiS <sub>6</sub> <sup>11</sup>                 | Ba <sub>3</sub> GaS <sub>4</sub> Br <sup>27</sup>               |                                                                  |                                                                              |                                               |                                                                |
| Cd <sub>4</sub> SiSe <sub>6</sub> <sup>12</sup>                | Cc                                                              | monoclinic                                                       | Ba <sub>3</sub> GaSe <sub>4</sub> Cl <sup>27</sup>                           | I4/mcm                                        | teragonal                                                      |
| Cd <sub>4</sub> GeS <sub>6</sub> <sup>13</sup>                 |                                                                 |                                                                  | Ba <sub>3</sub> InSe <sub>4</sub> Cl <sup>27</sup>                           |                                               |                                                                |
| Cd <sub>4</sub> GeSe <sub>6</sub> <sup>14</sup>                |                                                                 |                                                                  | Ba <sub>2</sub> BiGaS <sub>5</sub> <sup>28</sup>                             | Pnma                                          | orthorhombic                                                   |
| Hg <sub>4</sub> SiS <sub>6</sub> <sup>15</sup>                 | Ba <sub>2</sub> BiInS <sub>5</sub> <sup>28</sup>                | Cmc2 <sub>1</sub>                                                |                                                                              |                                               |                                                                |
| Hg <sub>4</sub> SiSe <sub>6</sub> <sup>15</sup>                | Cc                                                              | monoclinic                                                       | Ba <sub>4</sub> CuGa <sub>5</sub> S <sub>12</sub> <sup>29</sup>              | P4̄ <sub>2</sub> 1c                           | tetragonal                                                     |
| Hg <sub>4</sub> GeS <sub>6</sub> <sup>16</sup>                 |                                                                 |                                                                  | Ba <sub>4</sub> CuGa <sub>5</sub> Se <sub>12</sub> <sup>29</sup>             |                                               |                                                                |
| Li <sub>2</sub> ZnSnS <sub>4</sub> <sup>17</sup>               | Pn                                                              | orthorhombic                                                     | BaGa <sub>2</sub> SiS <sub>6</sub> <sup>30</sup>                             | R3                                            | trigonal                                                       |
| Li <sub>2</sub> ZnGeSe <sub>4</sub> <sup>18</sup>              |                                                                 |                                                                  | BaGa <sub>2</sub> GeS <sub>6</sub> <sup>30</sup>                             |                                               |                                                                |
| Li <sub>2</sub> ZnSnSe <sub>4</sub> <sup>18</sup>              |                                                                 |                                                                  | BaGa <sub>2</sub> SiSe <sub>6</sub> <sup>30</sup>                            |                                               |                                                                |
| Li <sub>2</sub> CdGeS <sub>4</sub> <sup>19</sup>               | Pmn2 <sub>1</sub>                                               | orthorhombic                                                     | BaGa <sub>2</sub> GeSe <sub>6</sub> <sup>30</sup>                            | Cc                                            | monoclinic                                                     |
| Li <sub>2</sub> CdSnS <sub>4</sub> <sup>19</sup>               |                                                                 |                                                                  | PbGa <sub>2</sub> SiSe <sub>6</sub> <sup>31</sup>                            |                                               |                                                                |
| Li <sub>2</sub> In <sub>2</sub> SiS <sub>6</sub> <sup>20</sup> | Cc                                                              | monoclinic                                                       | PbGa <sub>2</sub> GeSe <sub>6</sub> <sup>31</sup>                            | Fdd2                                          | orthorhombic                                                   |

**Table S3.** Dipole moment calculations for Na<sub>2</sub>CdGe<sub>2</sub>S<sub>6</sub> and Na<sub>2</sub>CdGe<sub>2</sub>Se<sub>6</sub>.

| Na <sub>2</sub> CdGe <sub>2</sub> S <sub>6</sub> |                       |                       |                       |           |                                             |
|--------------------------------------------------|-----------------------|-----------------------|-----------------------|-----------|---------------------------------------------|
| species                                          | dipole moment         |                       |                       |           |                                             |
|                                                  | <i>x</i> ( <i>a</i> ) | <i>y</i> ( <i>b</i> ) | <i>z</i> ( <i>c</i> ) | magnitude |                                             |
|                                                  |                       |                       |                       | debye     | $\times 10^{-4}$<br>esu·cm / Å <sup>3</sup> |
| Cd(1)S <sub>4</sub>                              | 6.80                  | 0.00                  | -9.98                 | 12.07     | 0.05                                        |
| Ge(1)S <sub>4</sub>                              | -4.63                 | 0.00                  | 3.09                  | 5.56      | 0.02                                        |
| Ge(2)S <sub>4</sub>                              | 1.64                  | 0.00                  | 16.68                 | 16.76     | 0.06                                        |
| Unit cell                                        | 3.81                  | 0.00                  | 9.79                  | 10.51     | 0.04                                        |

  

| Na <sub>2</sub> CdGe <sub>2</sub> Se <sub>6</sub> |                       |                       |                       |           |                                             |
|---------------------------------------------------|-----------------------|-----------------------|-----------------------|-----------|---------------------------------------------|
| species                                           | dipole moment         |                       |                       |           |                                             |
|                                                   | □                     |                       |                       | magnitude |                                             |
|                                                   | <i>x</i> ( <i>a</i> ) | <i>y</i> ( <i>b</i> ) | <i>z</i> ( <i>c</i> ) | debye     | $\times 10^{-4}$<br>esu·cm / Å <sup>3</sup> |
| CdSe <sub>4</sub>                                 | -8.74                 | 0.00                  | 13.84                 | 16.37     | 0.05                                        |
| Ge(1)Se <sub>4</sub>                              | -2.17                 | 0.00                  | -25.47                | 27.02     | 0.09                                        |
| Ge(2)Se <sub>4</sub>                              | 6.66                  | 0.00                  | -6.04                 | 11.55     | 0.04                                        |
| Unit cell                                         | -4.25                 | 0.00                  | -17.67                | 35.57     | 0.12                                        |

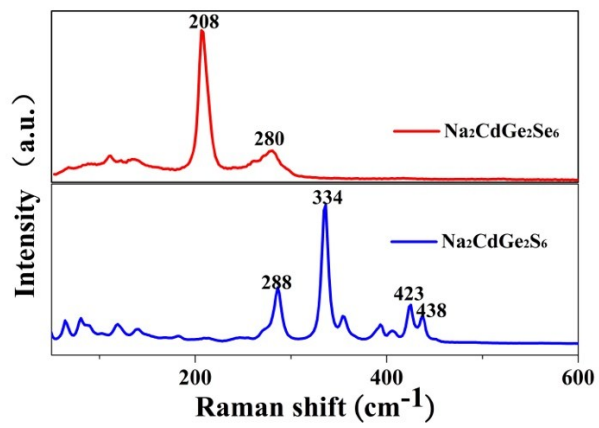

**Fig. S1.** Raman spectra for title compounds.

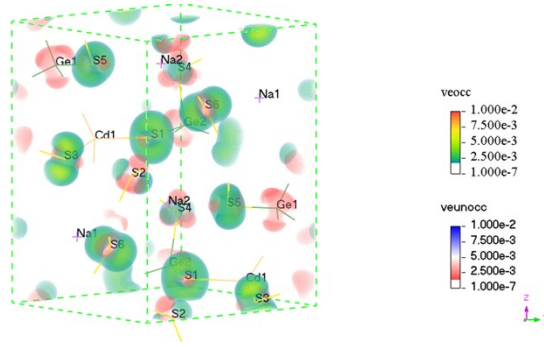

**Fig. S2.** SHG density calculation for  $\text{Na}_2\text{CdGe}_2\text{S}_6$ .

---

## References

1. (a) A. O. Okorogu, S. B. Mirov, W. Lee, D. I. Crouthamel, N. Jenkins, A. Y. Dergachev, K. L. Vodopyanov and V. V. Badikov, *Opt. Commun.*, 1998, **155**, 307; (b) G. D. Boyd, F. G. Storz, J. H. McFee and H. M. Kasper, *IEEE J. Quantum Electron.*, 1972, **8**, 900; (c) D. Parker and D. J. Singh, *Phys. Rev. B.*, 2012, **85**, 125209.
2. L. Isaenko, I. Vasilyeva, A. Merkulov, A. Yelisseyev and S. Lobanov, *J. Cryst. Growth.*, 2005, **275**, 217.
3. J. A. Brehm, S. M. Young, F. Zheng and A. M. Rappe, *J. Chem. Phys.*, 2014, **141**, 204704.
4. J. Olivier Fourcade, M. Ribes, E. Philippot and M. Maurin, *Acad. Sci., Ser. IIc: Chim.*, 1971, **272**, 1964.
5. I. Chung, J. H. Song, J. I. Jang, A. J. Freeman and M. G. Kanatzidis, *J. Solid State Chem.*, 2012, **195**, 161.
6. J. I. Jang, A. S. Haynes, F. O. Saouma, C. O. Otieno, and M. G. Kanatzidis, *Opt. Mater. Exp.*, 2013, **3**, 1302.
7. X. Lin, G. Zhang and N. Ye, *Cryst. Growth & Design.*, 2009, **9**, 1186.
8. J. Yao, D. Mei, L. Bai, Z. Lin, W. Yin, P. Fu and Y. Wu, *Inorg. Chem.*, 2010, **49**, 9212.
9. D. Mei, W. Yin, L. Bai, Z. Lin, J. Yao, P. Fu and Y. Wu, *Dalton Trans.*, 2011, **40**, 3610.
10. W. Khan, S. Azam, F. Shah, *Solid State Sci.*, 2015, **48**, 244.
11. X. Li, L. Kang, C. Li, Z. Lin, J. Yao and Y. Wu, *J. Mater. Chem. C*, 2015, **3**, 3060.
12. E. Kaldis, L. Krausbauer and R. Widmer, *J. Electrochem. Soc.*, 1967, **10**, 1074.
13. M. Julien-Pouzolet and S. Jaulmest, *Acta Crystallogr. Sect. C.*, 1995, **51**, 1966.
14. (a) S. Kovrch, A. Nemcsics, Z. Labadi and S. Motrya, *Inorg. Mater.* 2002, **39**, 108-112; (b) P. Quenez and O. Gorochov, *J. Cryst. Growth.*, 1974, **26**, 55.
15. L. D. Gulay, I. D. Olekseyuk and O. V. Parasyuk, *J. Alloys and Compd.*, 2002, **347**, 115.
16. J. Serment, G. Perez and P. Hagemuller, *Bull. Soc. Chim. Fr.* 1968, 561.
17. J. W. Lekse, B. M. Leverett, C. H. Lake and J. A. Aitken, *J. Solid State Chem.*, 2008, **181**, 3217.
18. J. Zhang, D. J. Clark, J. A. Brant, C. W. Sinagra, Y. S. Kim, J. I. Jangb and J. A. Aitken, *Dalton. Trans.* 2015, **44**, 11212.



- 
19. J. W. Lekse, M. A. Moreau, K. L. McNerny, J. Yeon, P. S. Halasyamani and J. A. Aitken, *Inorg. Chem.*, 2009, **48**, 7516.
  20. W. Yin, K. Feng, W. Hao, J. Yao and Y. Wu, *Inorg Chem.*, 2012, **51**, 5839.
  21. K. Wu, Z. Yang and S. Pan, *Chem. Mater.*, 2016, **28**, 2795.
  22. J. H. Liao, G. M. Marking, K. F. Hsu, Y. Matsushita, M. D. Ewbank, R. Borick, P. Cunningham, M. J. Rosker and M. G. Kanatzidis, *J. Am. Chem. Soc.*, 2003, **125**, 9484.
  23. G. A. Marking, J. A. Hanko and M. G. Kanatzidis, *Chem. Mater.* 1998, **10**, 1191.
  24. H. Lin, L. J. Zhou and L. Chen, *Chem. Mater.*, 2012, **24**, 3406.
  25. H. Lin, Y. Liu, L. J. Zhou, H. J. Zhao and L. Chen, *Inorg. chem.*, 2016, **55**, 4470.
  26. C. D. Morris, H. Li, H. Jin, C. D. Malliakas, J. A. Peters, P. N. Trikalitis, A. J. Freeman, B. W. Wessels and M. G. Kanatzidis, *Chem. Mater.*, 2013, **25**, 3344.
  27. K. Feng, W. Yin, Z. Lin, J. Yao and Y. Wu, *Inorg. Chem.*, 2013, **52**, 11503.
  28. L. Geng, W. D. Cheng, C. S. Lin, W. L. Zhang, H. Zhang and Z. Z. He, *Inorg. chem.*, 2011, **50**, 5679.
  29. S. M. Kuo, Y. M. Chang, I. Chung, J. I. Jang, B. H. Her, S. H. Yang, J. B. Ketterson, M. G. Kanatzidis and K. F. Hsu, *Chem. Mater.*, 2013, **25**, 2427.
  30. W. Yin, K. Feng, R. He, D. Mei, Z. Lin, J. Yao and Y. Wu, *Dalton Trans.*, 2012, **41**, 5653.
  31. Z. Z. Luo, C. S. Lin, H. H. Cui, W. L. Zhang, H. Zhang, H. Chen, Z. Z. He and W. D. Cheng, *Chem. Mater.*, 2015, **27**, 914.
